# Supplementary material
Source: PubMed Central journal article supplement (PMC6801076)
Supplement: NIHMS1535584-supplement-1.pdf [file NIHMS1535584-supplement-1.pdf]

**Supplementary Table S1.** Characteristics of 14 ovarian cancer PDX models.

| Clinical Attributes |                |                     |                   |                            | Genomic Characteristics      |                                           |            |                  |                    |                      |
|---------------------|----------------|---------------------|-------------------|----------------------------|------------------------------|-------------------------------------------|------------|------------------|--------------------|----------------------|
| PDX ID              | Subtype        | Prior Chemo-therapy | Previous Platinum | PARP inhibitor Sensitivity | <i>BRCA</i> Germline         | <i>BROCA</i> Mutations                    | PAX8 (IHC) | MYC (IHC Score)* | MYC Copy Number ** | CCNE1 Copy Number ** |
| DF20                | HGSOC          | 0                   | No                | Resistant                  | Unknown                      | <i>TP53, PTEN, PPM1D</i>                  | Positive   | 0                | 2.91               | 2.59                 |
| DF83                | HGSOC          | 4                   | Yes               | Sensitive                  | Unknown                      | <i>TP53, CDKN2A</i> (copy loss)           | Positive   | 1                | 2.12               | 2.2                  |
| DF09                | HGSOC          | 0                   | No                | Resistant                  | Unknown                      | <i>TP53</i>                               | Positive   | 1                | 1.99               | 2.34                 |
| DF14                | HGSOC          | 5                   | Yes               | Resistant                  | Unknown                      | <i>TP53</i>                               | Positive   | 1                | 3.01               | 2.25                 |
| DF106               | HGSOC          | 1                   | Yes               | Resistant                  | Unknown                      | <i>TP53, CDKN2A</i> (copy loss)           | Positive   | 1                | 3.12               | 2.17                 |
| DF118               | HGSOC          | 1                   | Yes               | Resistant                  | Unknown                      | <i>TP53</i>                               | Positive   | 2                | 2.67               | 2.14                 |
| DF149               | HGSOC          | 0                   | No                | Resistant                  | Wildtype                     | <i>TP53</i>                               | Positive   | 2                | 2.42               | 2.77                 |
| DF172               | Mixed          | 2                   | Yes               | Resistant                  | Unknown                      | <i>TP53, RET, RAD51C</i>                  | Positive   | 2                | 2.42               | 5.83                 |
| DF181               | HGSOC          | 7                   | Yes               | Resistant                  | Wildtype                     | <i>TP53, BRIP1</i>                        | Negative   | 0                | 3.2                | 2.41                 |
| DF216               | Adenocarcinoma | 2                   | Yes               | Resistant                  | Wildtype                     | <i>TP53</i>                               | Positive   | 2                | 3.24               | 2.47                 |
| DF59                | HGSOC          | 7                   | Yes               | Resistant                  | <i>BRCA1</i> 5385insC        | <i>TP53, BRCA1, TP53BP1</i>               | Positive   | 1                | 3.35               | 2.26                 |
| DF68                | HGSOC          | 5                   | Yes               | Resistant                  | <i>BRCA1</i> Q563X           | <i>TP53, BRCA1, PTEN</i> (copy loss)      | Positive   | N/A              | 2.31               | 2.3                  |
| DF86                | HGSOC          | 6                   | Yes               | Resistant                  | <i>BRCA1</i> del exons 21-24 | <i>TP53, BRCA1, APC</i>                   | Positive   | 2                | 4.37               | 3.66                 |
| DF101               | HGSOC          | 2                   | Yes               | Resistant                  | <i>BRCA1</i> 187del AG       | <i>TP53, BRCA1, NBN, PTEN</i> (copy loss) | Positive   | 0                | 2.44               | 2.27                 |

Most of the data reported in this table are from Liu JF et al, Clinical Cancer Res 2017;23:1263-73.

\*For MYC immunohistochemistry (IHC), scoring of 0 = null (no staining sample), 1 = normal (< 3+ intensity in < 50% of the cells) and 2 = amplified (strong expression (3+ intensity) in > 50% of cells)

\*\* *MYC* and *CCNE1* copy number data are from array CGH analysis from Liu JF et al, Clinical Cancer Res 2017;23:1263-73. Note that DF172 model exhibits significant copy gain of *CCNE1*, encoding Cyclin E.

The four *BRCA1*-mutant PDX models are shaded in blue.
