# Supplementary material
Source: PubMed Central journal article supplement (PMC6801076)

**OVSAHO**  
(HGSOC, *BRCA2* del, *RB1* del)

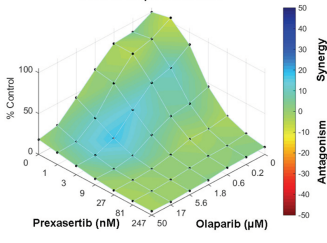

**KURAMOCHI**  
(HGSOC, *BRCA2* mut, *MYC* amp, *KRAS* amp)

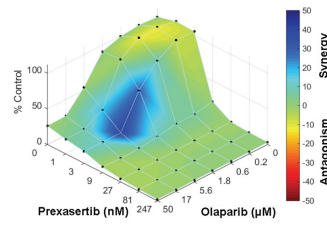

**COV362**  
(HGSOC, *BRCA1* mut, *MYC* amp, *RB1* del)

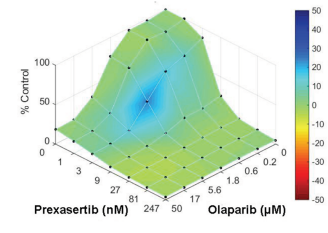

**OVCAR3**  
(HGSOC, *CCNE1* amp)

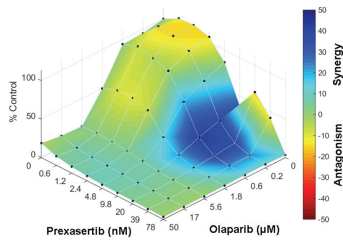

**JHOS2**  
(HGSOC, *BRCA1* mut)

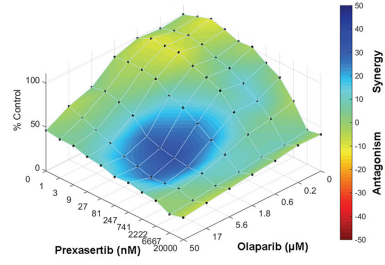

**OV90**  
(possibly HGSOC)

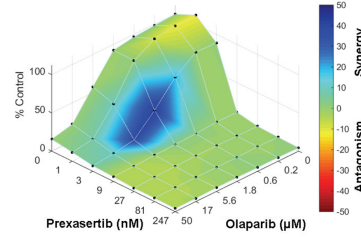

**A2780**  
(unlikely HGSOC, *PIK3CA* mut, *PTEN* mut, *BRAF* mut, *ARID1A* mut)

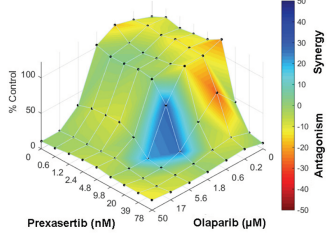

**PA-1**  
(unlikely HGSOC)

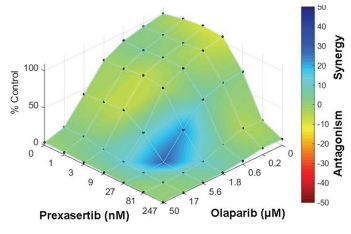

**SKOV3**  
(unlikely HGSOC, *PIK3CA* mut, *ARID1A* mut, *ERBB2* amp)

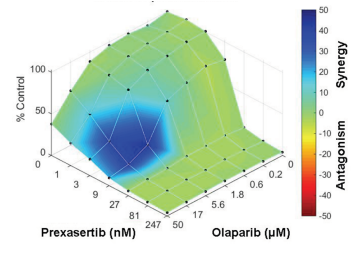

**OVTOKO**  
(unlikely HGSOC)

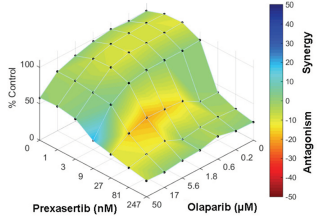

Supplement: NIHMS1535584-supplement-7.pdf [file NIHMS1535584-supplement-7.pdf]
