# Supplementary material
Source: PubMed Central journal article supplement (PMC6801076)

**A**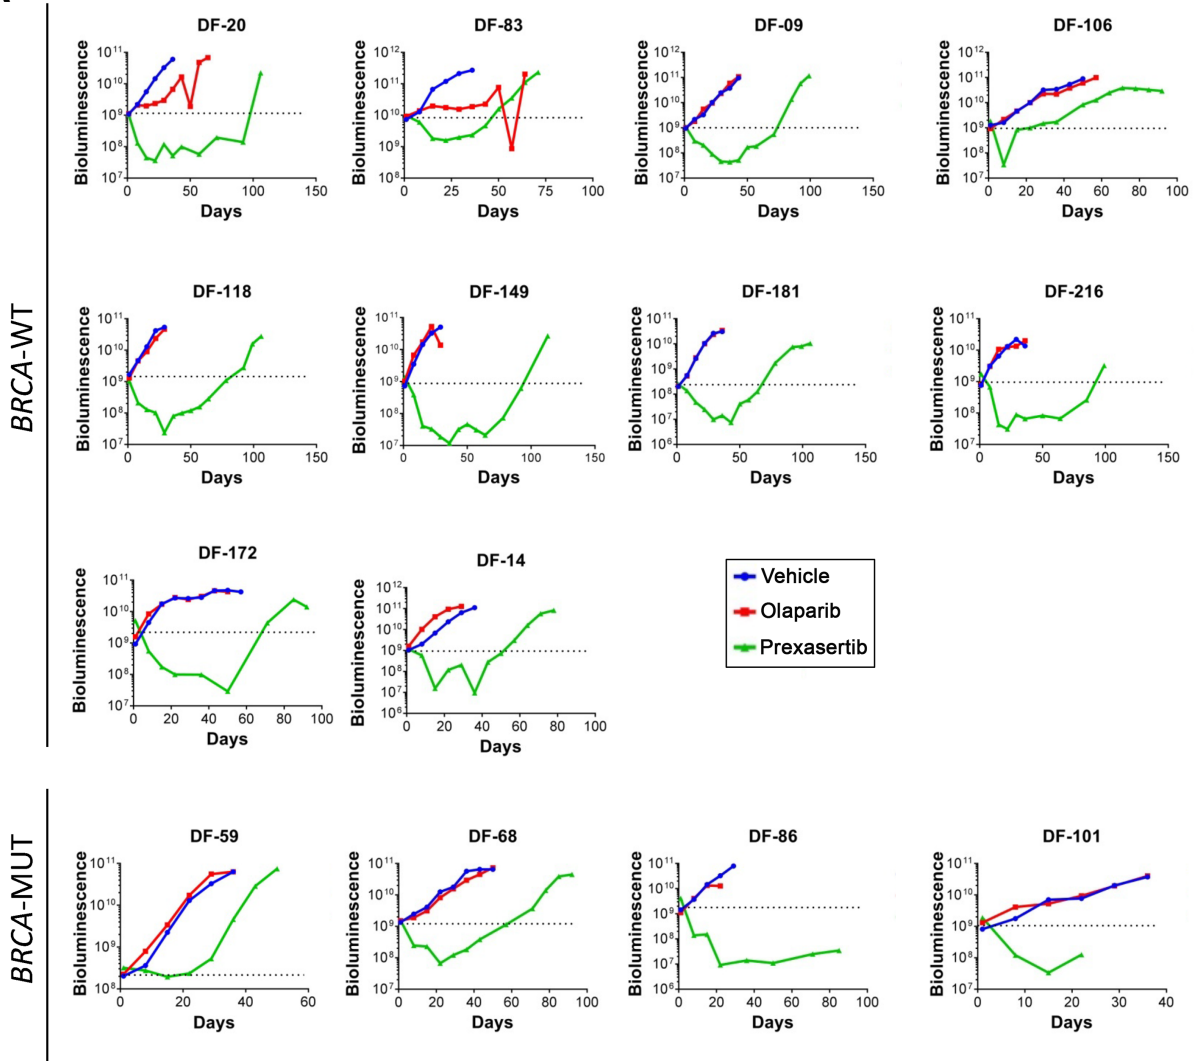**B**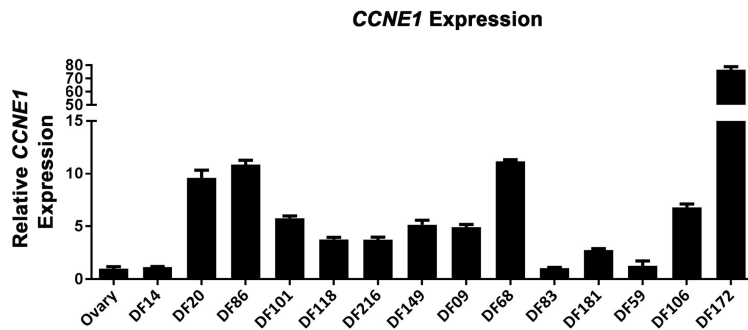

Supplementary Figure S1

Supplement: NIHMS1535584-supplement-3.pdf [file NIHMS1535584-supplement-3.pdf]

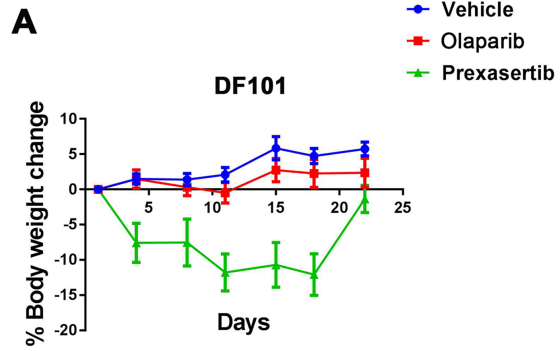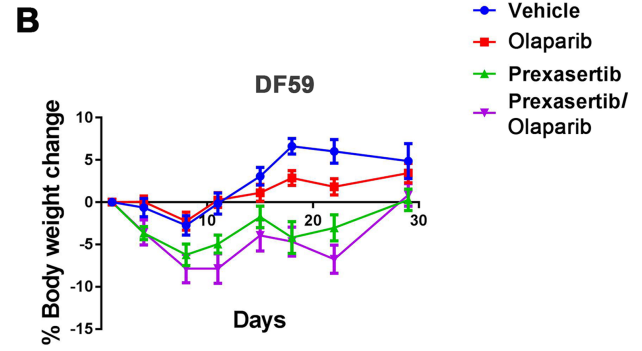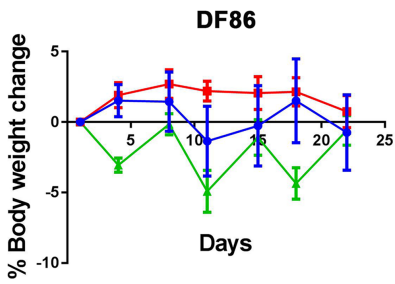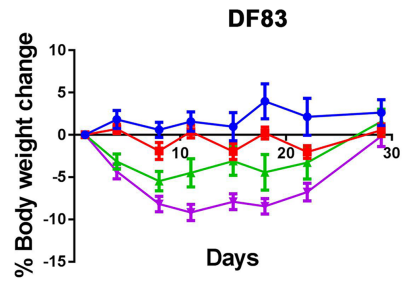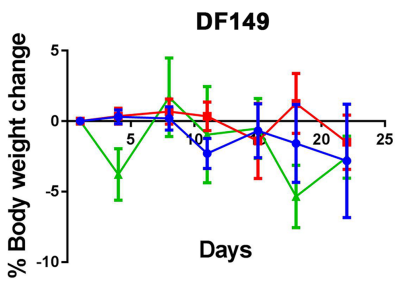

Supplementary Figure S2

Supplement: NIHMS1535584-supplement-4.pdf [file NIHMS1535584-supplement-4.pdf]

**A** RAD51 foci

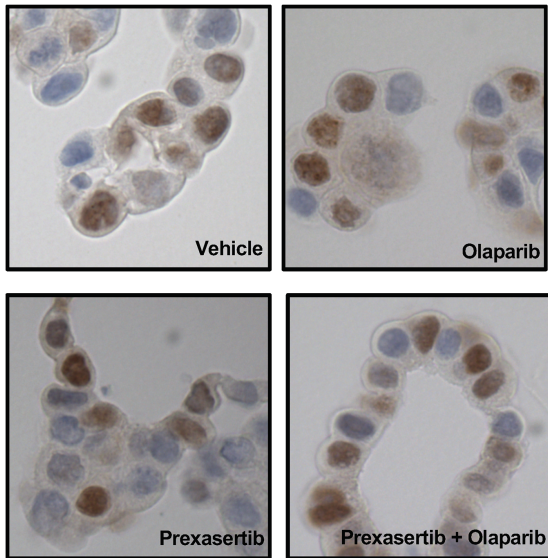

**B**  $\gamma$ H2AX foci

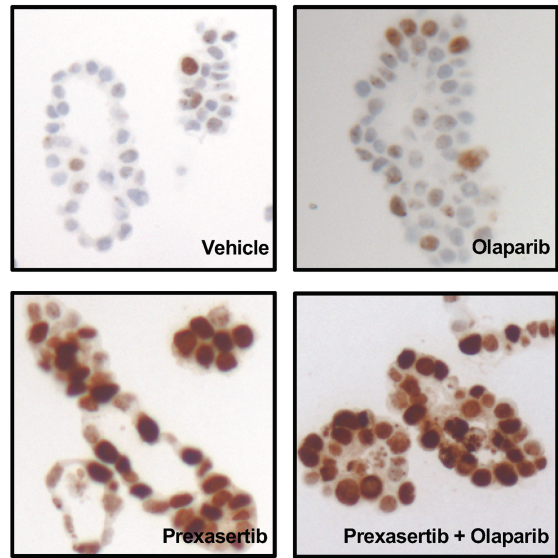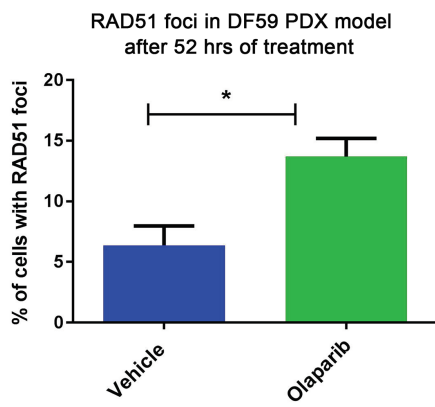

Supplement: NIHMS1535584-supplement-5.pdf [file NIHMS1535584-supplement-5.pdf]

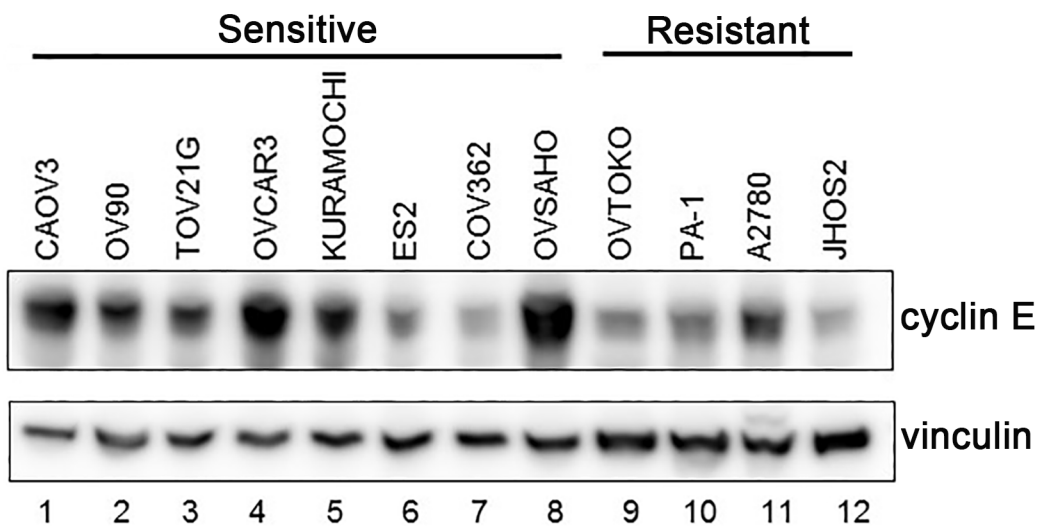

Supplementary Figure S4

Supplement: NIHMS1535584-supplement-6.pdf [file NIHMS1535584-supplement-6.pdf]

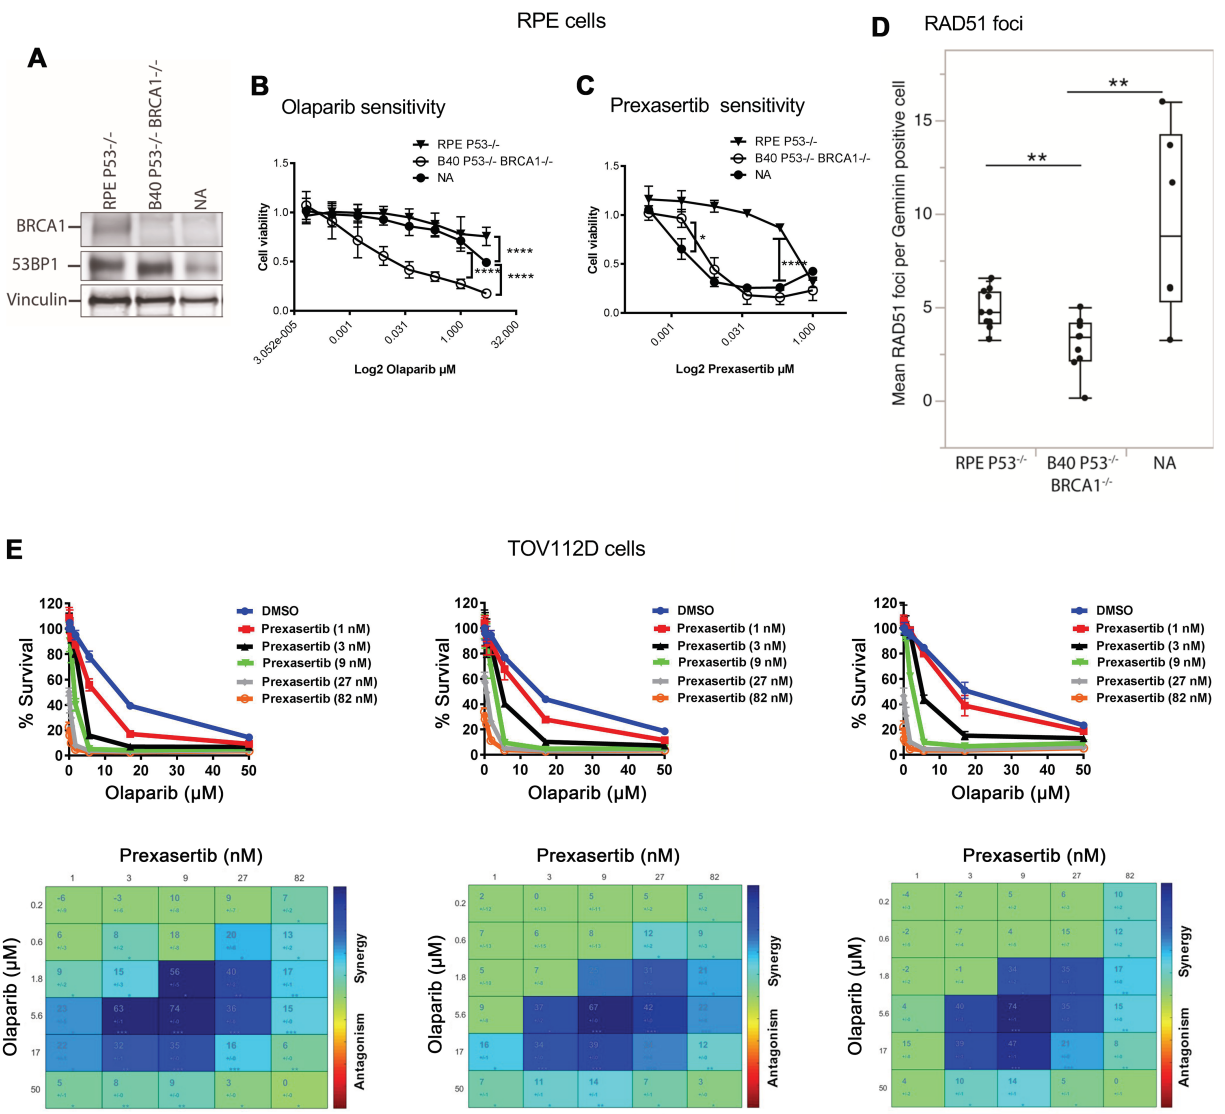

Supplementary Figure S6

Supplement: NIHMS1535584-supplement-8.pdf [file NIHMS1535584-supplement-8.pdf]

**A** Prexasertib sensitivity

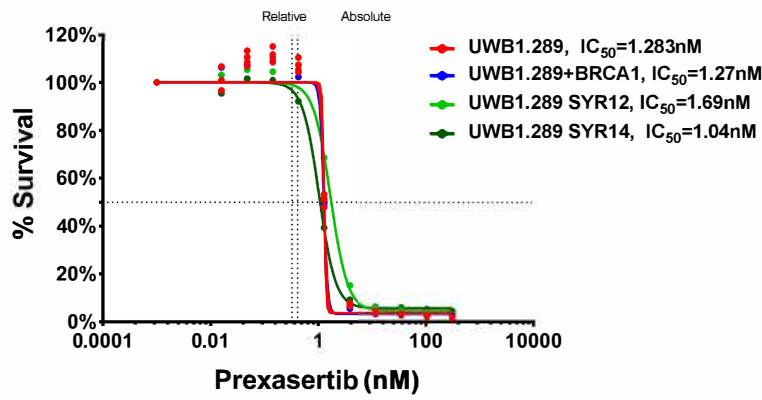

**B** Prexasertib/olaparib sensitivity

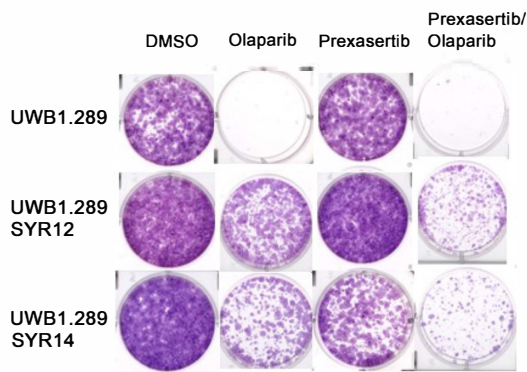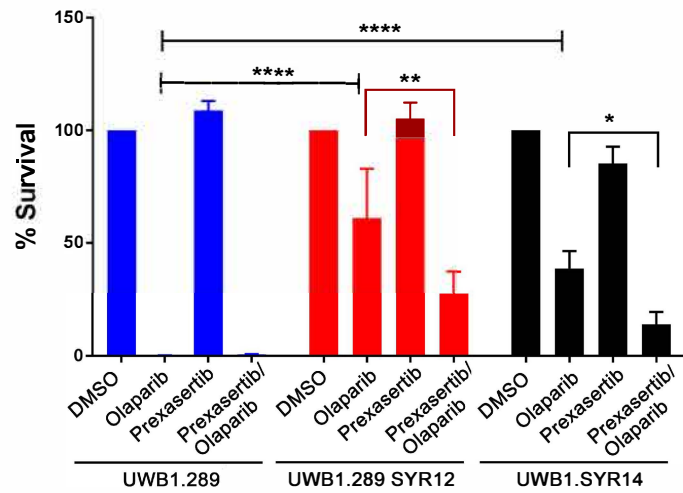

Supplementary Figure S7

Supplement: NIHMS1535584-supplement-9.pdf [file NIHMS1535584-supplement-9.pdf]
